# Supplementary material for: Metagenomics-Guided Survey, Isolation, and Characterization of Uranium Resistant Microbiota from the Savannah River Site, USA
Source: PubMed Central journal article supplement (PMC6562407; doi:10.3390/genes10050325), 2019-04-28

# **Metagenomics-guided Analysis, Isolation and Characterization of Uranium Resistant Microbiota Using a High-throughput Approach**

Rajneesh Jaswal<sup>1\*</sup>, Ashish Pathak<sup>1\*</sup>, Bobby Edwards III<sup>1</sup>, Robert Lewis III<sup>1</sup>, John C. Seaman<sup>2</sup>, Paul Stothard<sup>3</sup>, Kirill Krivushin<sup>3</sup>, Jochen Blom<sup>4</sup>, Oliver Rupp<sup>4</sup>,  
Ashvini Chauhan<sup>1\*</sup>

<sup>1</sup>School of the Environment, 1515 S. MLK Blvd., Suite 305B, Building FSHSRC, Florida A&M University, Tallahassee, FL 32307, USA

<sup>2</sup>Savannah River Ecology Laboratory, The University of Georgia. PO Drawer E, Aiken, SC 29802, USA

<sup>3</sup>Department of Agricultural, Food and Nutritional Science, University of Alberta, Edmonton, AB T6G2P5, Canada

<sup>4</sup>Bioinformatics and Systems Biology, Justus-Liebig-University Giessen, 35392 Giessen, Germany

\*Corresponding Author: Mailing address: Environmental Biotechnology Laboratory, School of the Environment, 1515 S. MLK Blvd., Suite 305B FSHSRC, Florida A&M University, Tallahassee, FL 32307, USA; Phone: 850-412-5119; Fax: 850-561-2248; E-mail: [ashvini.chauhan@famu.edu](mailto:ashvini.chauhan@famu.edu)

**Table S1.** Shotgun based sequence reads obtained from the SRS soils and DC/MT culture conditions. total Shown are sequencing depth, number of reads that mapped to taxonomic annotations, number of reads that mapped to a Phylum, and number of reads that mapped to the SEED functional database.

| Sample ID | Raw Reads | Total NR (taxonomic) Alignments | Percent  | Phylum Sum | Percent  | Total Functional Alignments |
|-----------|-----------|---------------------------------|----------|------------|----------|-----------------------------|
| DC Soil   | 9827394   | 2294597                         | 0.23349  | 2066334    | 0.210263 | 1129787                     |
| MT Soil   | 2170172   | 457303                          | 0.210722 | 411335     | 0.18954  | 225413                      |
| DC Gen 1  | 12630198  | 3518023                         | 0.278541 | 3303629    | 0.261566 | 1597742                     |
| DC Gen 2  | 12206380  | 3027513                         | 0.248027 | 2806697    | 0.229937 | 1386391                     |
| MT Gen 1  | 13656466  | 5622632                         | 0.411719 | 5336589    | 0.390774 | 2782196                     |
| MT Gen 2  | 13852746  | 4002908                         | 0.288961 | 3732288    | 0.269426 | 1894069                     |

**Table S2.** Shown are the EDGAR identified set of gene homologues identified in strain MT2 that likely perform a biodegradative or metal resistance function(s)

| <b>Category</b>           | <b>Gene Homologue</b>                                                                                                                                                                                                                                                                                                                                 |
|---------------------------|-------------------------------------------------------------------------------------------------------------------------------------------------------------------------------------------------------------------------------------------------------------------------------------------------------------------------------------------------------|
| Metal Resistance Proteins | Metal tolerance protein 10<br>ATP-dependent zinc metalloprotease FtsH<br>Copper fist DNA binding domain protein<br>Iron transport multicopper oxidase FET3<br>Putative Zinc finger CCHC-type protein<br>Iron transport multicopper oxidase FET3<br>Siderophore iron transporter mirB<br>Iron-sulfur assembly protein 2<br>Magnesium transporter NIPA2 |
| Transporter Proteins      | Tetracycline transporter<br>General substrate transporter<br>CDR ABC transporter<br>ABC transporter substrate-binding protein<br>ABC transporter ATP-binding protein<br>Putative Monocarboxylate transporter                                                                                                                                          |
| Cytochromes               | Cytochrome P450 monooxygenase orf3<br>NADH-cytochrome b5 reductase 1<br>Cytochrome C biogenesis protein ResB                                                                                                                                                                                                                                          |
| Drug Resistance           | Multidrug resistance protein fnx1<br>Multidrug export protein EmrA                                                                                                                                                                                                                                                                                    |
| Efflux Pumps              | Efflux pump FUB11<br>Efflux pump roqT<br>Efflux pump FUS6<br>Efflux pump dotC<br>Efflux pump dotC<br>Efflux pump FUB11                                                                                                                                                                                                                                |

**Figure S1.** A, shown are the bacterial core microbiome at the genus level identified using shotgun metagenomic libraries from the SRS soils. Genera at 50% prevalence cutoff value was used to generate the plot. Also shown are the dendrogram analysis at the bacterial genus level using the Bray-Curtis index and the ward clustering algorithm (B). Groups shown in the plots refer to the metadata in which soils used in DC and MT experiments were binned: group 1 (soils used for DC/MT); group 2 (DC Gen1), group 3 (DC Gen2), group 4 (MT Gen1) and group 5 (MT Gen2), respectively.

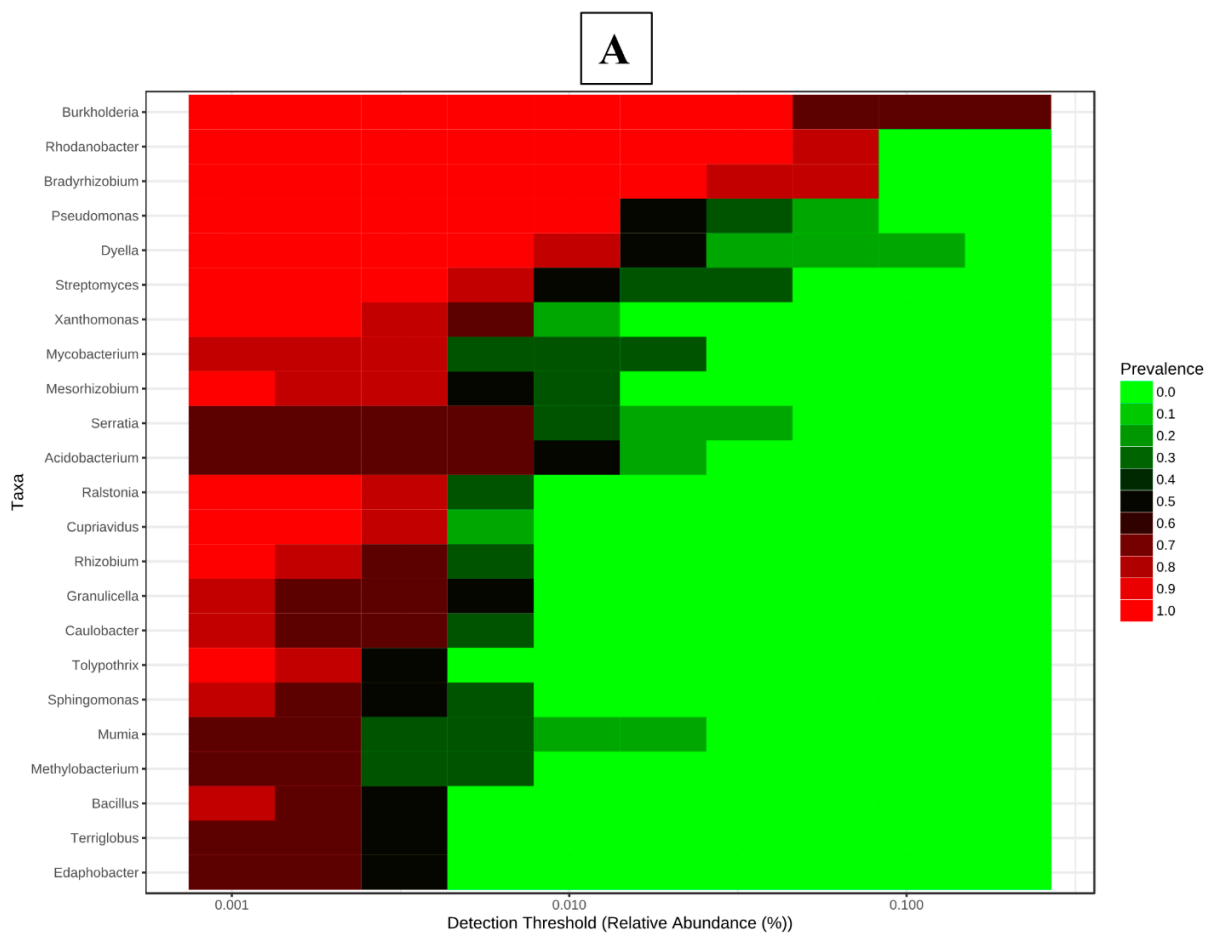

**B**

- 1
- 2
- 3
- 4
- 5

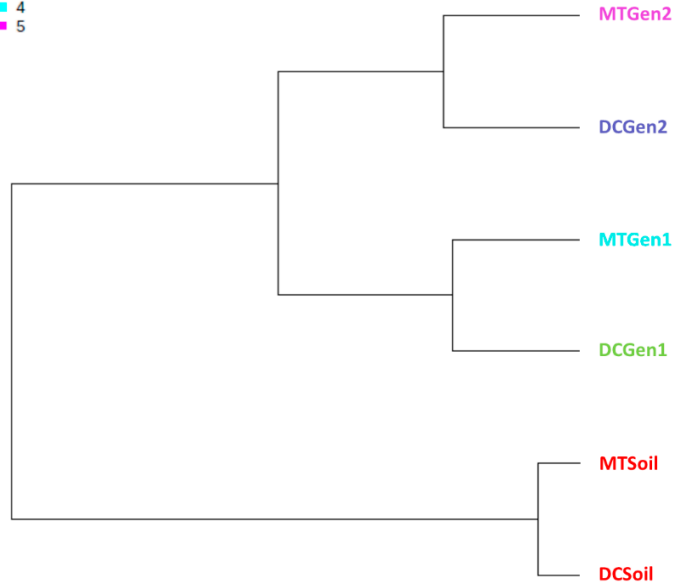

0.6 0.4 0.2 0.0

**Figure S2.** Shown are the (A), univariate statistical comparisons of *Burkholderia* spp., in soil (class 1) with Gen 1 DC/MT (class 2 and 3) and Gen 2 DC/MT (class 4 and 5) and (B), differential count analysis of *Burkholderia* spp., in soil (class 1) with Gen 1 DC/MT (class 2 and 3) and Gen 2 DC/MT (class 4 and 5).

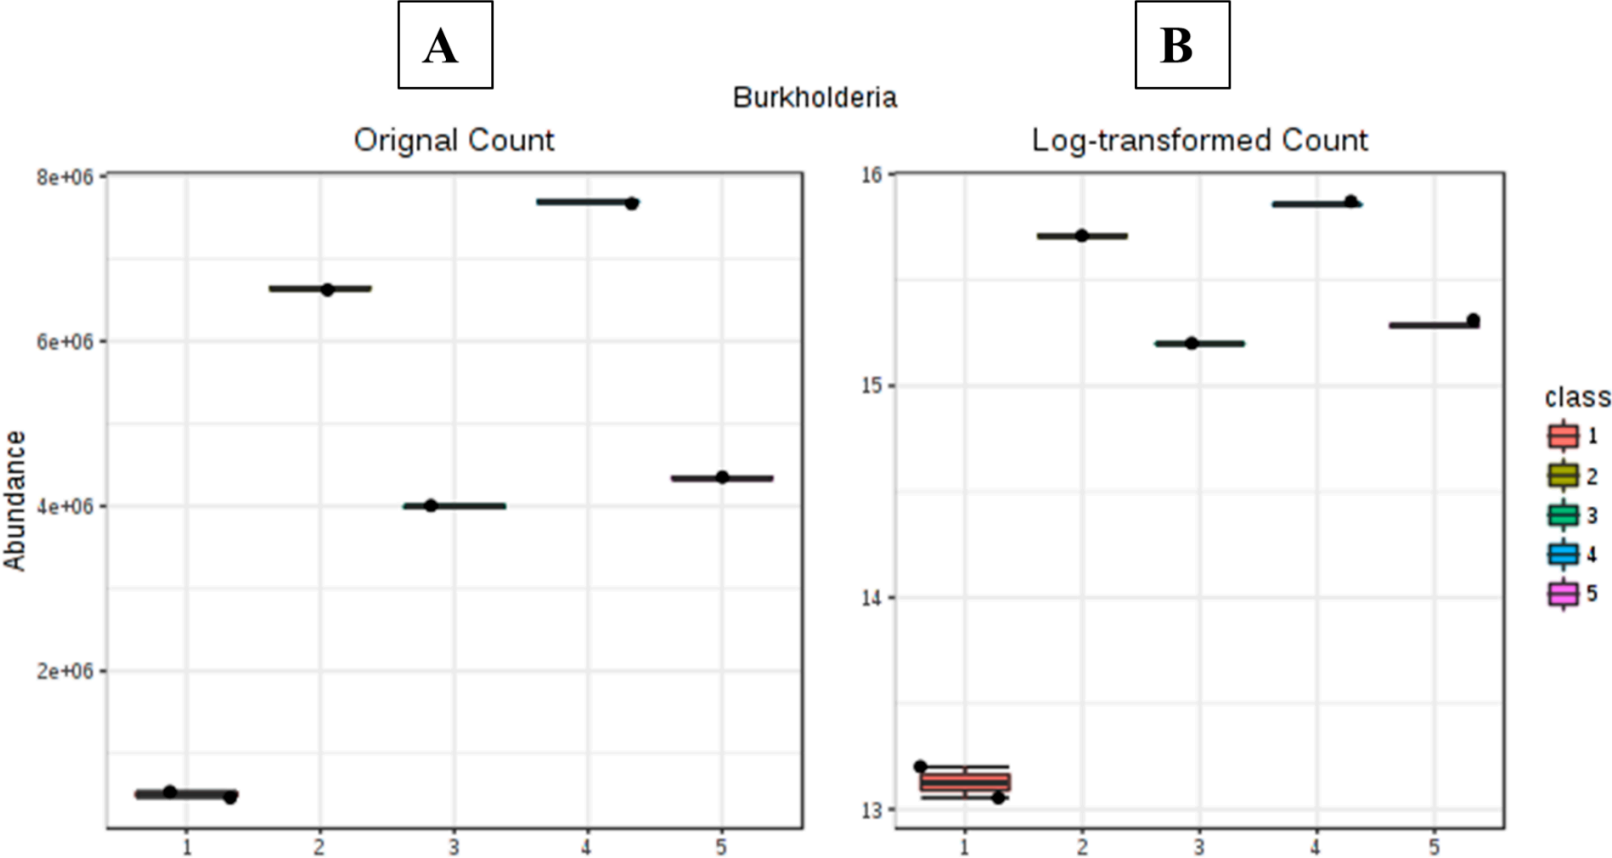

**Figure S3.** Archaeal relative abundance analysis shown at the phyla (A) and genus (B) levels identified from the soils and DC/MT chambers. Groups shown in the plots refer to the metadata in which soils used in DC and MT experiments were binned: group 1 (soils used for DC/MT); group 2 (DC Gen1), group 3 (DC Gen2), group 4 (MT Gen1) and group 5 (MT Gen2), respectively.

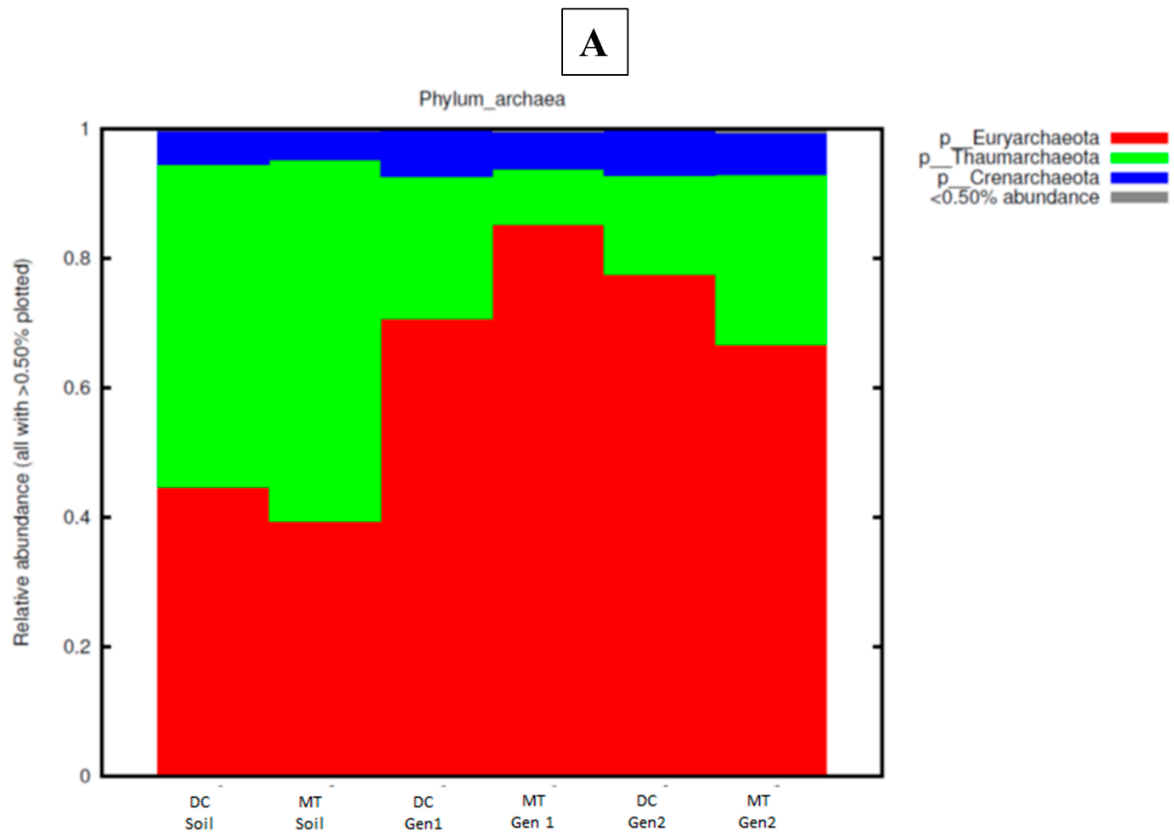

**B**

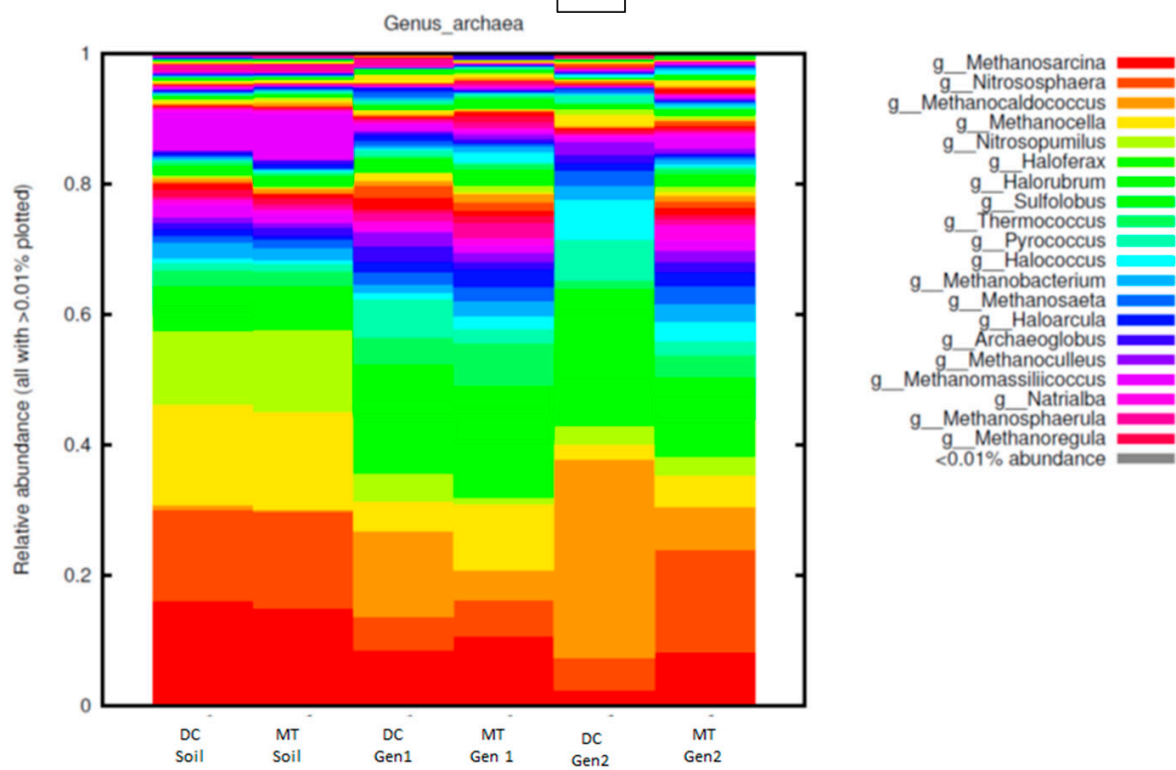



**Figure S4. A**, shown are the archaeal core microbiome at the genus level identified using shotgun metagenomic libraries from the SRS soils. Genera at 50% prevalence cutoff value was used to generate the plot. Also shown are the dendrogram analysis at the archaeal genus level using the Bray-Curtis index and the ward clustering algorithm (B). Groups shown in the figure refer to the metadata in which soils used in DC and MT experiments were binned: group 1 (soils used for DC/MT); group 2 (DC Gen1), group 3 (DC Gen2), group 4 (MT Gen1) and group 5 (MT Gen2), respectively.

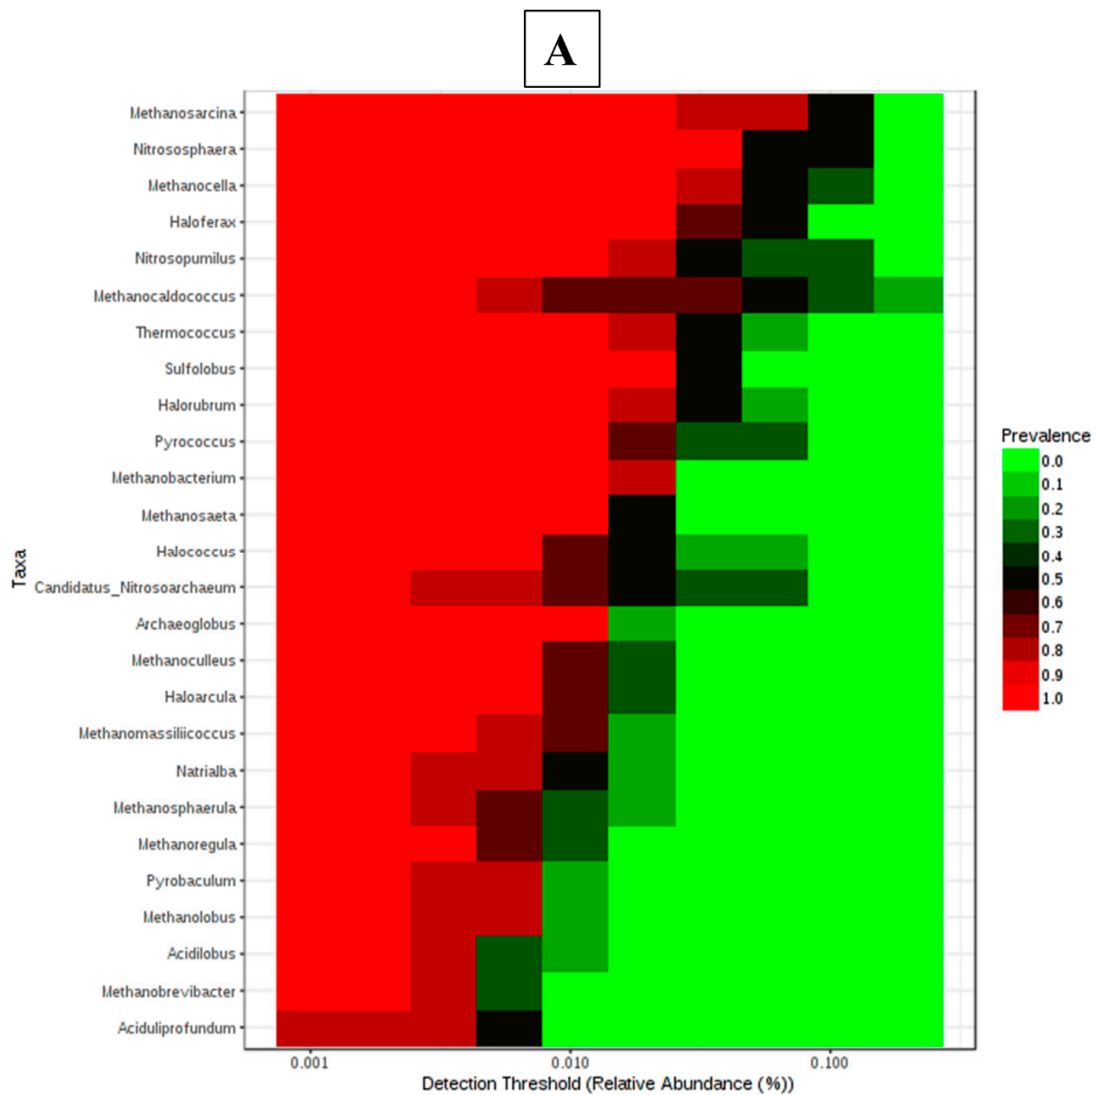

**B**

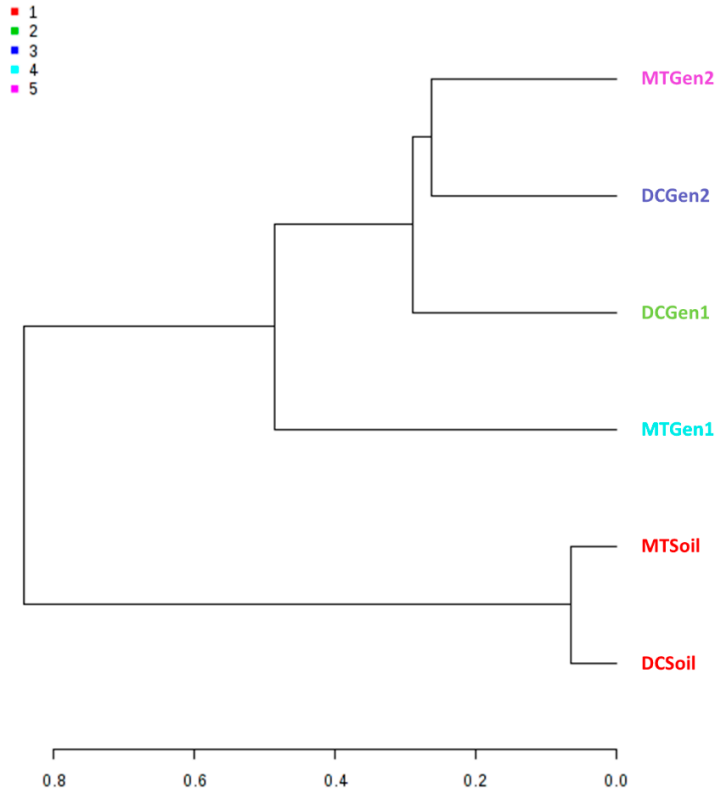

**Figure S5.** Shown is the heatmap analysis of gene functions identified from the SRS soils across different generations of DC/MT (A); the PCA statistical comparisons of gene functions identified in the SRS soils with different generations of DC/MT (B) and (C), the dendrogram analysis of gene functions using the unweighted UniFrac distance and ward clustering algorithm. Groups shown in the figure refer to the metadata in which soils used in DC and MT experiments were binned: group 1 (soils used for DC/MT); group 2 (DC Gen1), group 3 (DC Gen2), group 4 (MT Gen1) and group 5 (MT Gen2), respectively.

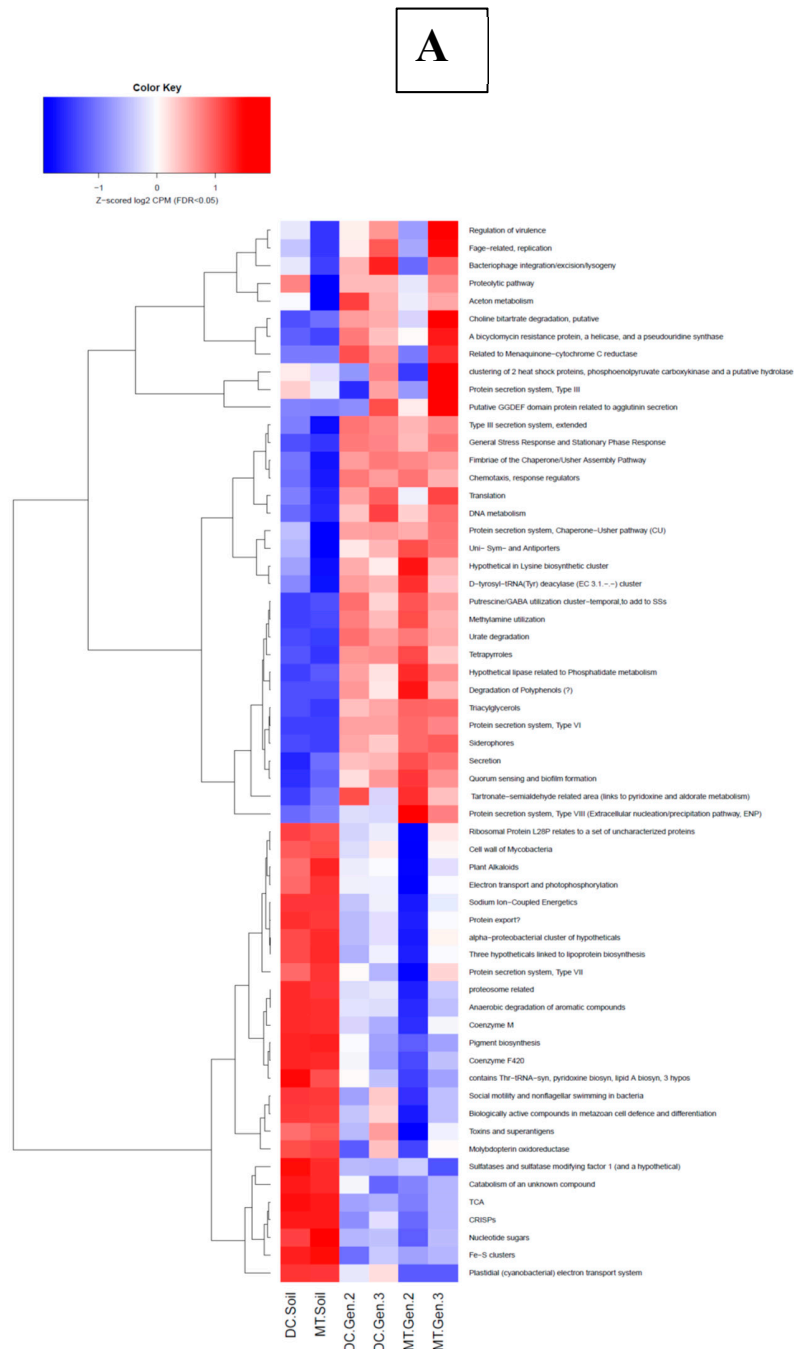

**B**

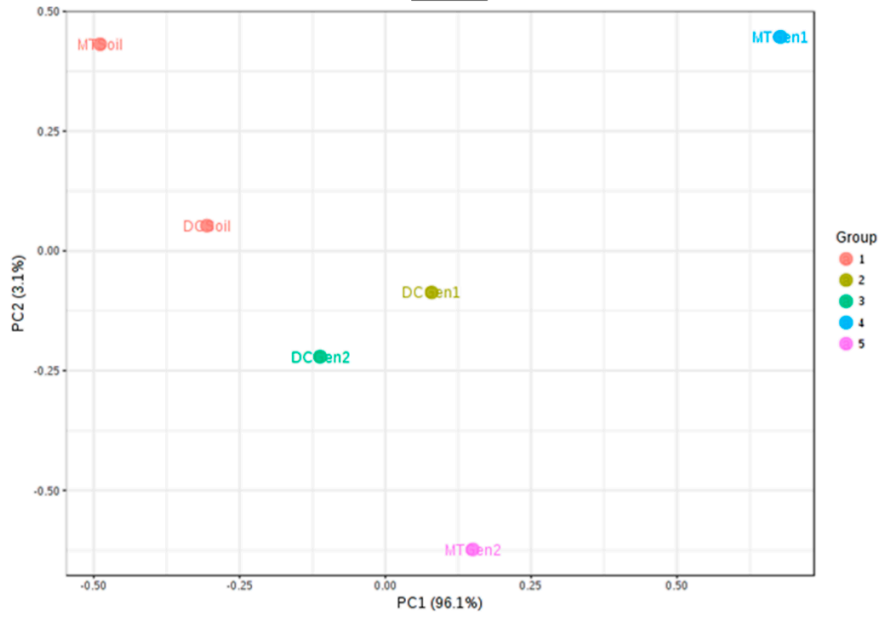

**C**

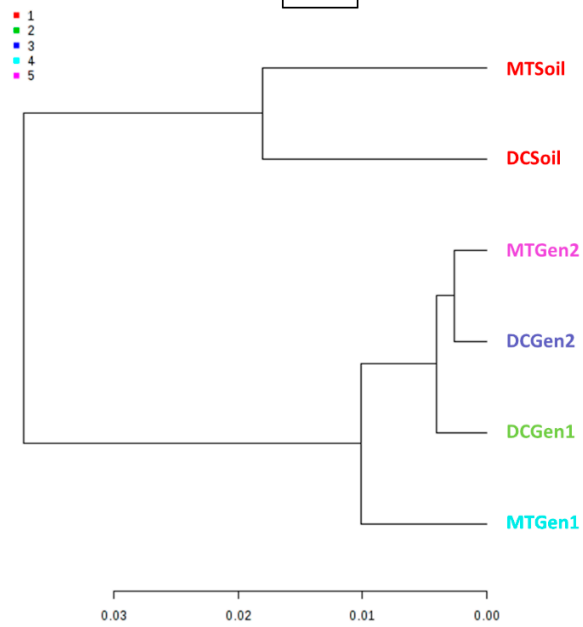

**Figure S6.** Shown is the 16S gene based phylogenetic tree of the isolated *Burkholderia* strains DC2 and DC3 relative to close taxonomic members (A). Also shown is the 18S gene based phylogenetic tree of isolated *Penicillium* strains DC2, DC3 and MT 2, respectively. The trees were constructed using neighbor joining bootstrap analysis in MEGA.

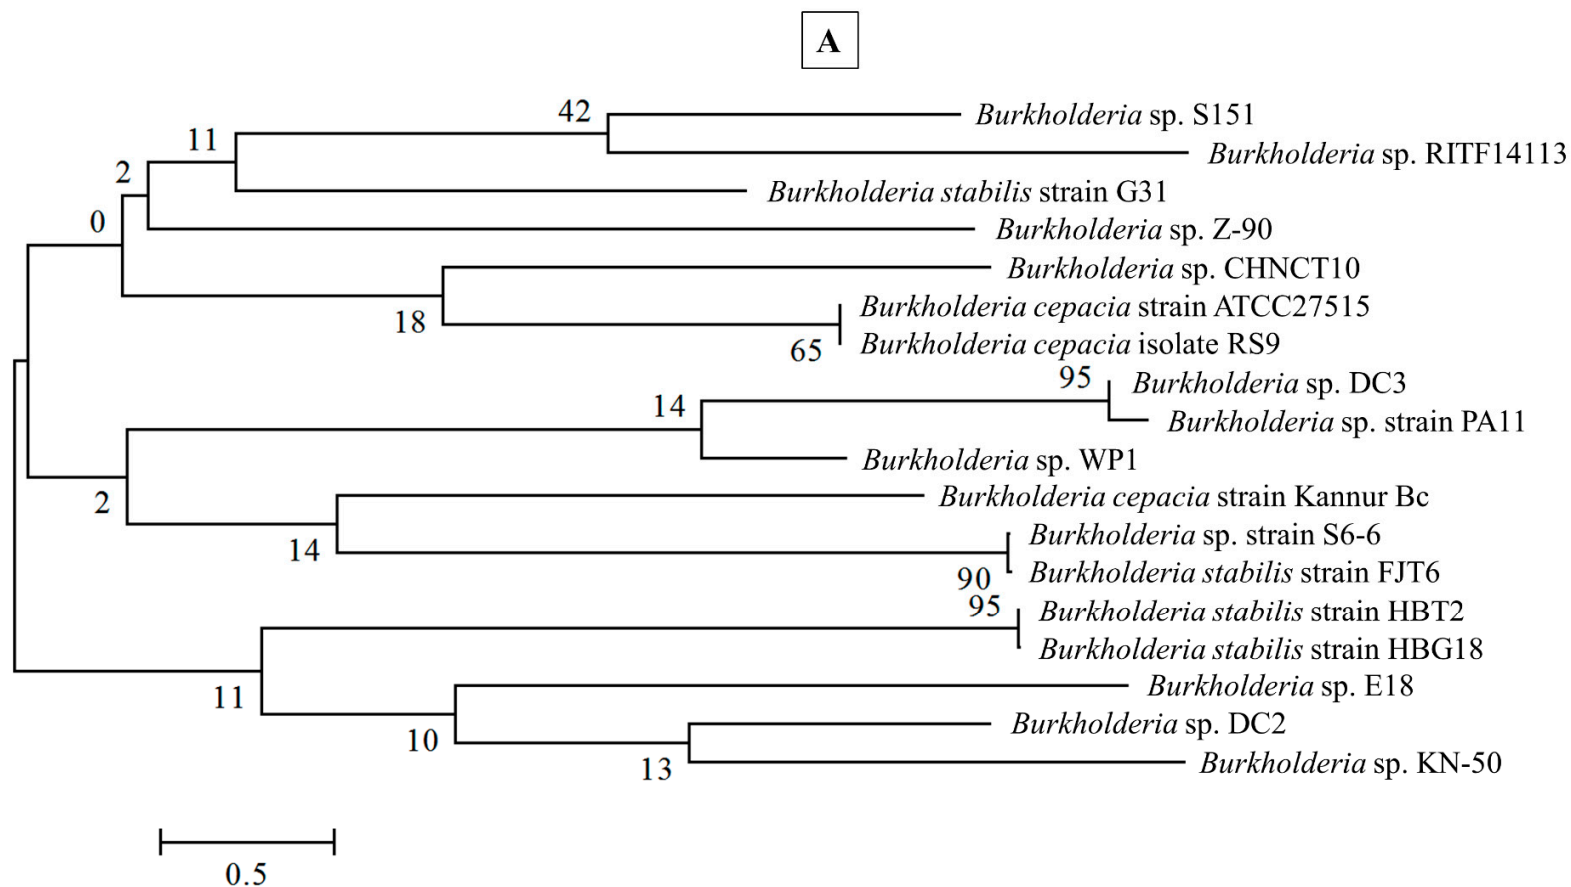

**B**

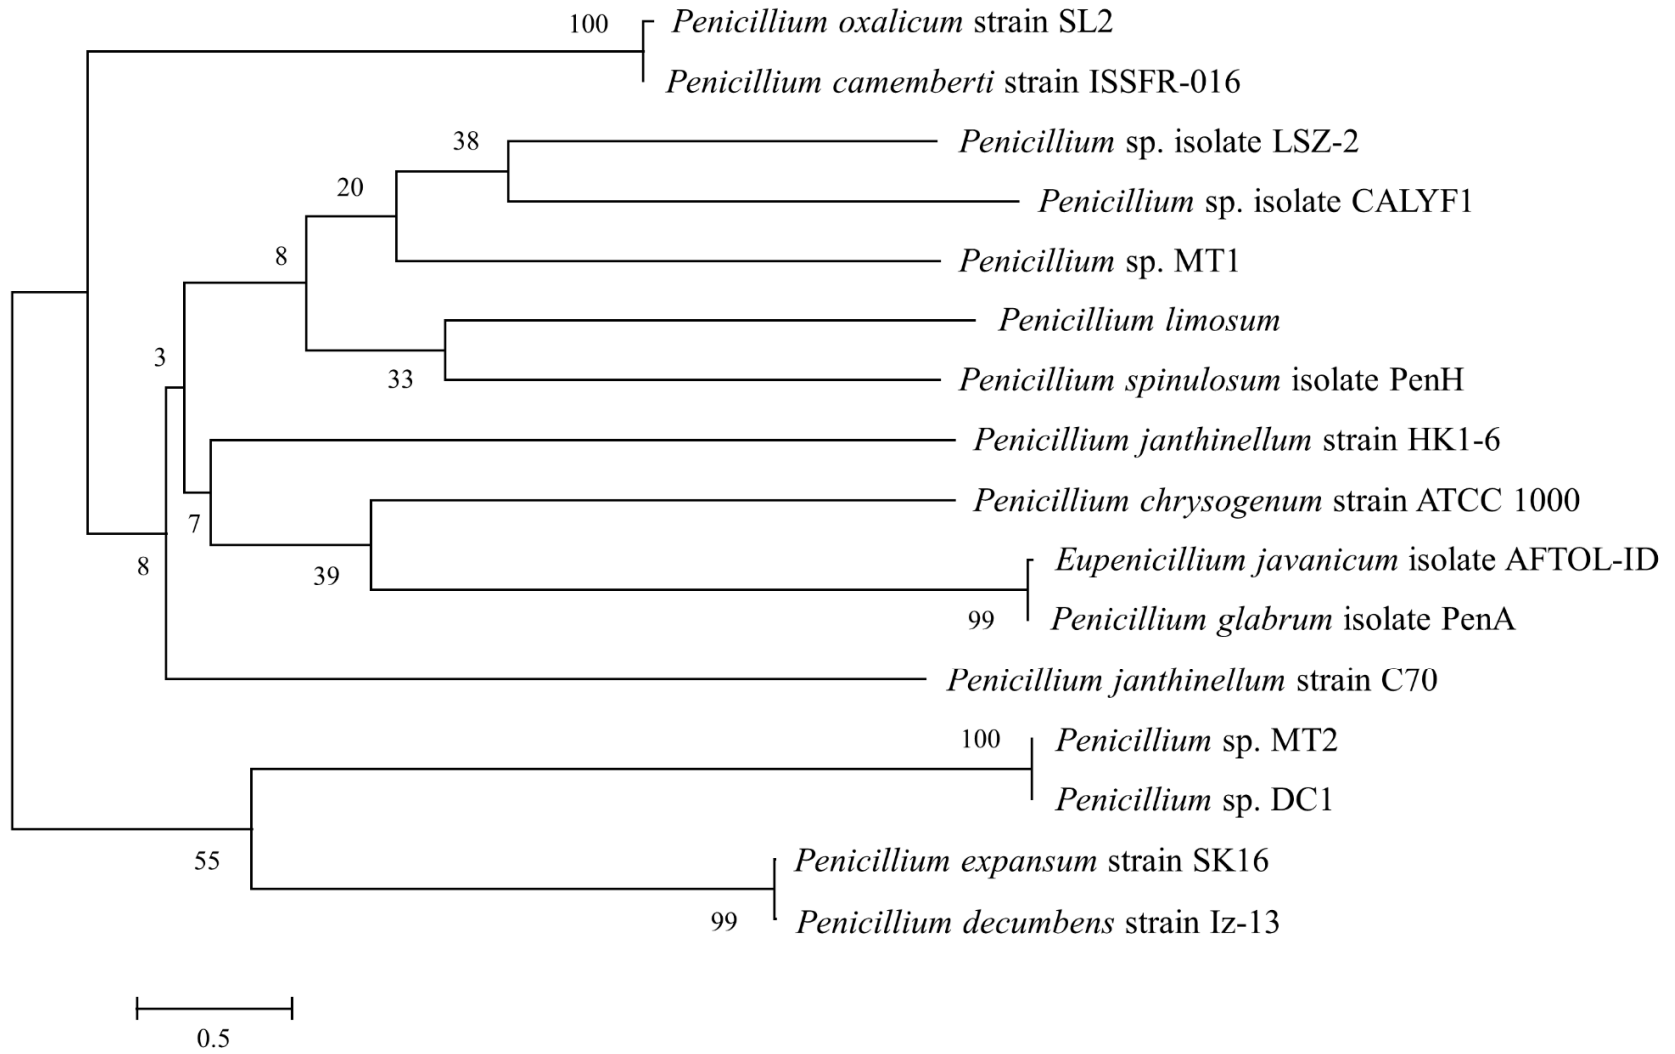

**Figure S7.** Whole genome sequence based synteny dot plots generated between *Penicillium* sp. strain MT2 and the closest phylogenetic neighbor *P. janthinellum* strain NCIMI366.

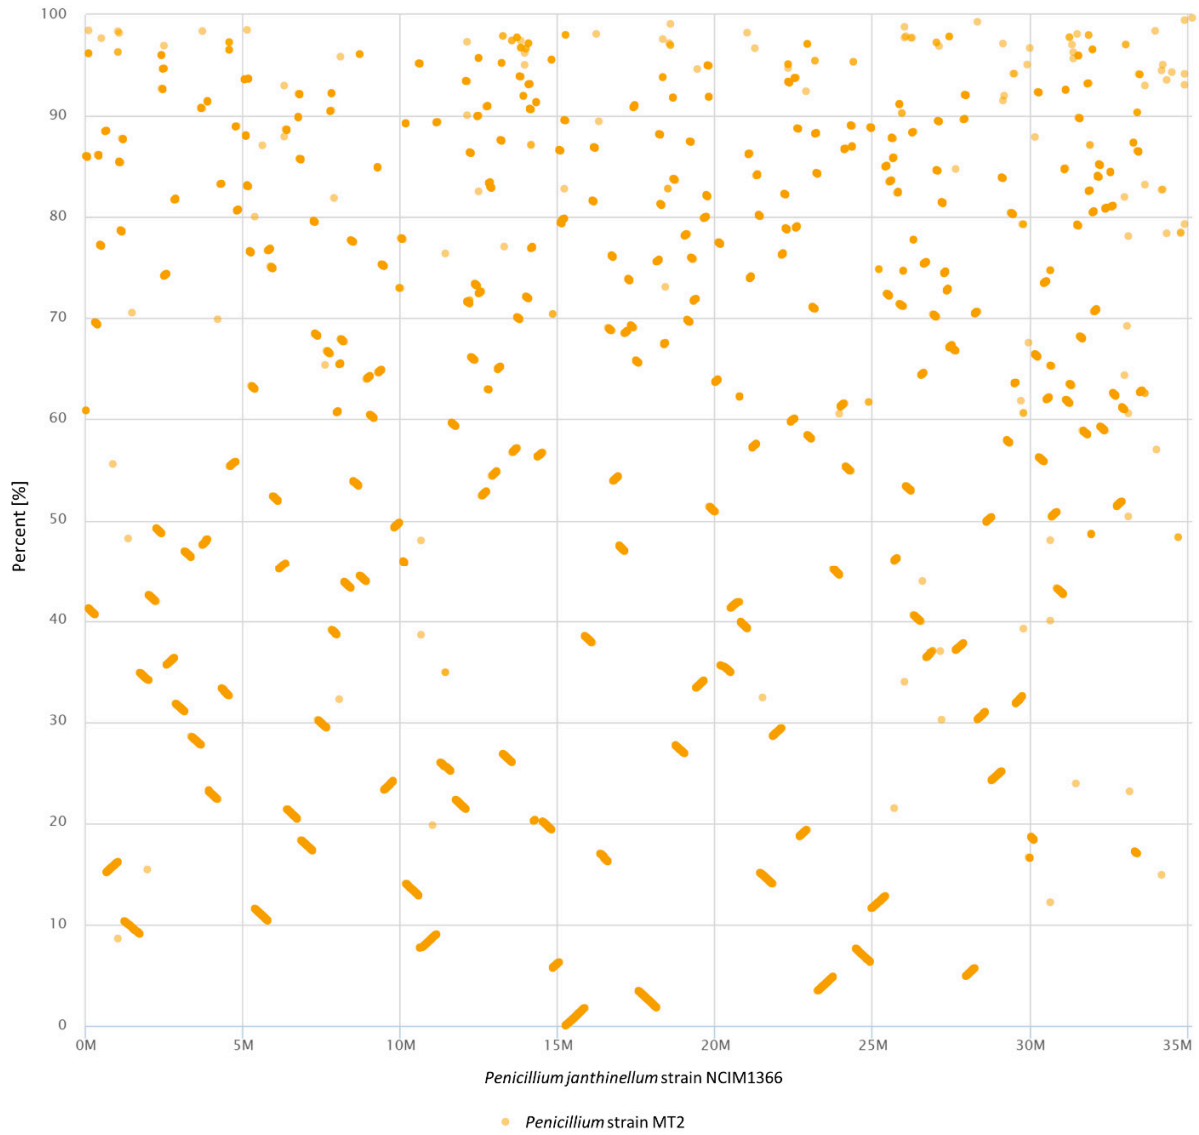

Supplement: genes-10-00325-s001.pdf [file genes-10-00325-s001.pdf]
